# Supplementary material
Source: Springer Nature journal article supplement (https://www.springermedizin.de/resource/supplementary/12936_2006_305_MOESM3_ESM.pdf/9547138)

Overestimation in failure rate using ITT approach (multiples)

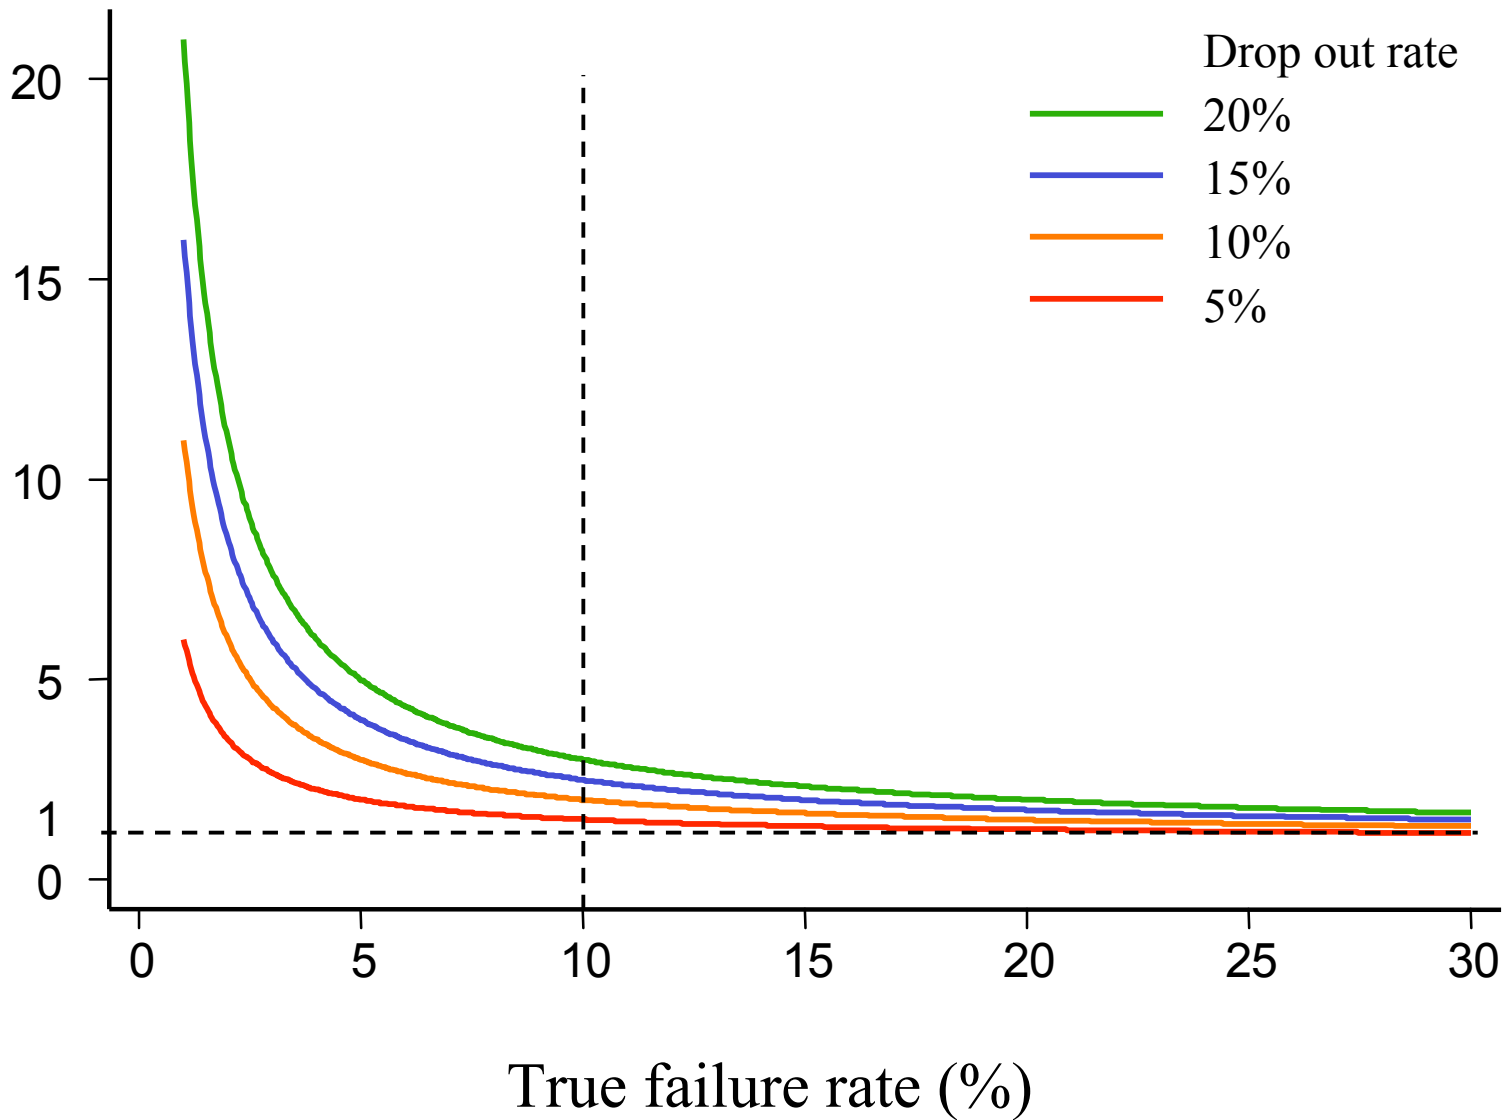

Supplement: MOESM3 [file 9547138]
